# Supplementary material for: Molecular spinning top: visualizing the dynamics of M3N@C80 with variable temperature single crystal X-ray diffraction
Source: Royal Society of Chemistry journal article supplement (doi:10.1039/c9cc06363c), 2019-01-01
Supplement: c9cc06363c1.pdf [file c9cc06363c1.pdf]

## **Molecular Spinning Top: Visualizing the Dynamics of $M_3N@C_{80}$ with Variable Temperature Single Crystal X-ray Diffraction**

Fupin Liu, and Lukas Spree

### ***Electronic Supplementary Information***

#### **Experimental Details**

Very high-quality single crystals were obtained by co-crystallization of  $Ho_2LuN@C_{80}$  or  $Lu_3N@C_{80}$  with NiOEP. X-ray diffraction data collection was carried out at the BESSY storage ring (BL14.3, Berlin-Adlershof, Germany).<sup>1</sup> XDSAPP2.0 suite was employed for data processing.<sup>2</sup> The structure was solved by direct methods and refined by SHELXL-2018.<sup>3</sup> Hydrogen atoms were added geometrically, and refined with a riding model. The crystal data are presented in Table S1 and S5 in the ESI.

Table S1. Crystal data\_Ho<sub>2</sub>LuN@C<sub>80</sub>.

| Crystal                                            | Ho <sub>2</sub> LuN@C <sub>80</sub> @NiOEP@2(C <sub>6</sub> H <sub>6</sub> ) | Ho <sub>2</sub> LuN@C <sub>80</sub> @NiOEP@2(C <sub>6</sub> H <sub>6</sub> ) | Ho <sub>2</sub> LuN@C <sub>80</sub> @NiOEP@2(C <sub>6</sub> H <sub>6</sub> ) |
|----------------------------------------------------|------------------------------------------------------------------------------|------------------------------------------------------------------------------|------------------------------------------------------------------------------|
| Formula                                            | C <sub>128</sub> H <sub>56</sub> Ho <sub>2</sub> Lu N <sub>5</sub> Ni        | C <sub>128</sub> H <sub>56</sub> Ho <sub>2</sub> Lu N <sub>5</sub> Ni        | C <sub>128</sub> H <sub>56</sub> Ho <sub>2</sub> Lu N <sub>5</sub> Ni        |
| Formula weight                                     | 2227.31                                                                      | 2227.31                                                                      | 2227.31                                                                      |
| Color, habit                                       | Black, block                                                                 | Black, block                                                                 | Black, block                                                                 |
| Crystal system                                     | triclinic                                                                    | triclinic                                                                    | triclinic                                                                    |
| Space group                                        | <i>P</i> $\bar{1}$                                                           | <i>P</i> $\bar{1}$                                                           | <i>P</i> $\bar{1}$                                                           |
| <i>a</i> , Å                                       | 14.700(3)                                                                    | 14.730(3)                                                                    | 14.750(3)                                                                    |
| <i>b</i> , Å                                       | 15.380(3)                                                                    | 15.410(3)                                                                    | 15.430(3)                                                                    |
| <i>c</i> , Å                                       | 17.730(4)                                                                    | 17.740(4)                                                                    | 17.760(4)                                                                    |
| <i>α</i> , deg                                     | 81.00(3)                                                                     | 81.10(3)                                                                     | 81.21(3)                                                                     |
| <i>β</i> , deg                                     | 74.53(3)                                                                     | 74.48(3)                                                                     | 74.41(3)                                                                     |
| <i>γ</i> , deg                                     | 86.56(3)                                                                     | 86.55(3)                                                                     | 86.49(3)                                                                     |
| Volume, Å <sup>3</sup>                             | 3815.0(15)                                                                   | 3832.5(15)                                                                   | 3846.7(15)                                                                   |
| <i>Z</i>                                           | 2                                                                            | 2                                                                            | 2                                                                            |
| <i>T</i> , K                                       | 100                                                                          | 130                                                                          | 160                                                                          |
| Radiation (λ, Å)                                   | Synchrotron Radiation (0.89429)                                              | Synchrotron Radiation (0.89429)                                              | Synchrotron Radiation (0.89429)                                              |
| Unique data ( <i>R</i> <sub>int</sub> )            | 14968 (0.0418)                                                               | 15130 (0.0474)                                                               | 14943 (0.0485)                                                               |
| Parameters                                         | 1268                                                                         | 1288                                                                         | 1311                                                                         |
| Restraints                                         | 43                                                                           | 51                                                                           | 105                                                                          |
| Observed data ( <i>I</i> > 2σ( <i>I</i> ))         | 13648                                                                        | 13210                                                                        | 12158                                                                        |
| <i>R</i> <sub>1</sub> <sup>a</sup> (observed data) | 0.0504                                                                       | 0.0629                                                                       | 0.0728                                                                       |
| <i>wR</i> <sub>2</sub> <sup>b</sup> (all data)     | 0.1459                                                                       | 0.1820                                                                       | 0.2193                                                                       |
| CCDC NO.                                           | 1947203                                                                      | 1947204                                                                      | 1947205                                                                      |

$$R_1 = \frac{\sum ||F_o| - |F_c||}{\sum |F_o|} \quad . \quad wR_2 = \sqrt{\frac{\sum [w(F_o^2 - F_c^2)^2]}{\sum [w(F_o^2)^2]}}$$

<sup>a</sup>For data with *I* > 2σ(*I*), <sup>b</sup>For all data,

Table S1. Crystal data\_Ho<sub>2</sub>LuN@C<sub>80</sub>\_continued.

| Crystal                                            | Ho <sub>2</sub> LuN@C <sub>80</sub> NiOEP <sub>2</sub> (C <sub>6</sub> H <sub>6</sub> ) | Ho <sub>2</sub> LuN@C <sub>80</sub> NiOEP <sub>2</sub> (C <sub>6</sub> H <sub>6</sub> ) | Ho <sub>2</sub> LuN@C <sub>80</sub> NiOEP <sub>2</sub> (C <sub>6</sub> H <sub>6</sub> ) |
|----------------------------------------------------|-----------------------------------------------------------------------------------------|-----------------------------------------------------------------------------------------|-----------------------------------------------------------------------------------------|
| Formula                                            | C <sub>128</sub> H <sub>56</sub> Ho <sub>2</sub> Lu N <sub>5</sub> Ni                   | C <sub>128</sub> H <sub>56</sub> Ho <sub>2</sub> Lu N <sub>5</sub> Ni                   | C <sub>128</sub> H <sub>56</sub> Ho <sub>2</sub> Lu N <sub>5</sub> Ni                   |
| Formula weight                                     | 2227.31                                                                                 | 2227.31                                                                                 | 2227.31                                                                                 |
| Color, habit                                       | Black, block                                                                            | Black, block                                                                            | Black, block                                                                            |
| Crystal system                                     | triclinic                                                                               | triclinic                                                                               | triclinic                                                                               |
| Space group                                        | <i>P</i> $\bar{1}$                                                                      | <i>P</i> $\bar{1}$                                                                      | <i>P</i> $\bar{1}$                                                                      |
| <i>a</i> , Å                                       | 14.760(3)                                                                               | 14.800(3)                                                                               | 14.810(3)                                                                               |
| <i>b</i> , Å                                       | 15.460(3)                                                                               | 15.490(3)                                                                               | 15.500(3)                                                                               |
| <i>c</i> , Å                                       | 17.790(4)                                                                               | 17.890(4)                                                                               | 17.940(4)                                                                               |
| <i>α</i> , deg                                     | 81.26(3)                                                                                | 81.20(3)                                                                                | 81.15(3)                                                                                |
| <i>β</i> , deg                                     | 74.34(3)                                                                                | 74.06(3)                                                                                | 73.94(3)                                                                                |
| <i>γ</i> , deg                                     | 86.42(3)                                                                                | 86.21(3)                                                                                | 86.15(3)                                                                                |
| Volume, Å <sup>3</sup>                             | 3862.4(15)                                                                              | 3895.9(15)                                                                              | 3909.1(15)                                                                              |
| <i>Z</i>                                           | 2                                                                                       | 2                                                                                       | 2                                                                                       |
| <i>T</i> , K                                       | 190                                                                                     | 250                                                                                     | 280                                                                                     |
| Radiation (λ, Å)                                   | Synchrotron Radiation (0.89429)                                                         | Synchrotron Radiation (0.89429)                                                         | Synchrotron Radiation (0.89429)                                                         |
| Unique data ( <i>R</i> <sub>int</sub> )            | 11923 (0.0541)                                                                          | 15398 (0.0571)                                                                          | 15466 (0.0613)                                                                          |
| Parameters                                         | 1321                                                                                    | 1321                                                                                    | 1309                                                                                    |
| Restraints                                         | 825                                                                                     | 1102                                                                                    | 1210                                                                                    |
| Observed data ( <i>I</i> > 2σ( <i>I</i> ))         | 9856                                                                                    | 10717                                                                                   | 10338                                                                                   |
| <i>R</i> <sub>1</sub> <sup>a</sup> (observed data) | 0.0808                                                                                  | 0.1304                                                                                  | 0.1462                                                                                  |
| <i>wR</i> <sub>2</sub> <sup>b</sup> (all data)     | 0.2372                                                                                  | 0.4232                                                                                  | 0.4549                                                                                  |
| CCDC NO.                                           | 1947206                                                                                 | 1947207                                                                                 | 1947208                                                                                 |

$$R_1 = \frac{\sum ||F_o| - |F_c||}{\sum |F_o|} \quad .^b \text{For all data,} \quad wR_2 = \sqrt{\frac{\sum [w(F_o^2 - F_c^2)^2]}{\sum [w(F_o^2)^2]}}$$

<sup>a</sup>For data with *I* > 2σ(*I*),

**Table S2. Nearest cage carbon-Ni contact distances as a function of temperature\_Ho<sub>2</sub>LuN@C<sub>80</sub>**

| Temperature (K) | 100      | 130      | 160      | 190     | 250     | 280     |
|-----------------|----------|----------|----------|---------|---------|---------|
| Ni1P-C1A (Å)    | 2.810(6) | 2.812(7) | 2.795(8) | 2.81(1) | 2.85(2) | 2.86(2) |

**Table S3. Selected M-N bond lengths as a function of temperature\_Ho<sub>2</sub>LuN@C<sub>80</sub>**

| Temperature (K)    | 100             | 130             | 160             | 190             | 250             | 280             |
|--------------------|-----------------|-----------------|-----------------|-----------------|-----------------|-----------------|
| Ho1-N1 (Å)         | 2.050(4)        | 2.058(4)        | 2.063(4)        | 2.047(5)        | 2.032(6)        | 2.020(6)        |
| Ho2-N1 (Å)         | 2.043(4)        | 2.036(4)        | 2.016(4)        | 2.007(5)        | 2.018(6)        | 1.998(7)        |
| Ho3-N1 (Å)         | 2.018(5)        | 2.019(6)        | 2.026(5)        | 2.025(6)        | 2.028(8)        | 2.039(9)        |
| Ho4-N1 (Å)         | 2.052(4)        | 2.043(5)        | 2.022(4)        | 2.005(5)        | 2.032(5)        | 1.999(7)        |
| Ho5-N1 (Å)         | 1.96(2)         | 1.99(2)         | 1.978(7)        | 1.96(1)         | 1.98(1)         | 1.94(1)         |
| Ho6-N1 (Å)         |                 | 2.018(9)        | 2.011(6)        | 2.00(1)         | 1.977(8)        | 1.973(9)        |
| Ho7-N1 (Å)         |                 | 2.053(9)        | 2.037(6)        | 2.015(7)        | 2.012(7)        | 1.986(8)        |
| Ho8-N1 (Å)         |                 | 1.98(2)         | 1.98(2)         | 1.96(2)         | 1.92(2)         | 1.94(2)         |
| Ho9-N1 (Å)         |                 |                 | 1.99(2)         | 2.01(2)         | 2.00(2)         | 2.02(2)         |
| Ho10-N1 (Å)        |                 |                 |                 | 1.99(2)         | 2.01(1)         | 2.00(1)         |
| Ho11-N1 (Å)        |                 |                 |                 | 2.01(2)         | 2.02(2)         | 1.99(2)         |
| <b>Average (Å)</b> | <b>2.044(5)</b> | <b>2.039(6)</b> | <b>2.025(6)</b> | <b>2.011(7)</b> | <b>2.010(8)</b> | <b>1.993(9)</b> |
| Lu1-N1 (Å)         | 2.042(4)        | 2.033(4)        | 2.013(5)        | 2.071(6)        | 2.003(8)        | 1.930(7)        |
| Lu2-N1 (Å)         | 2.055(5)        | 2.025(5)        | 1.978(5)        | 1.970(7)        | 1.922(7)        | 1.957(9)        |
| Lu3-N1 (Å)         |                 | 2.031(6)        | 2.075(6)        | 1.932(7)        | 1.954(7)        | 2.026(7)        |
| <b>Average (Å)</b> | <b>2.044(5)</b> | <b>2.031(5)</b> | <b>2.014(5)</b> | <b>1.992(7)</b> | <b>1.956(8)</b> | <b>1.984(8)</b> |
| Ni1P-N1P (Å)       | 1.968(4)        | 1.964(4)        | 1.963(4)        | 1.961(5)        | 1.949(6)        | 1.958(6)        |
| Ni1P-N2P (Å)       | 1.962(3)        | 1.967(4)        | 1.964(4)        | 1.966(4)        | 1.963(5)        | 1.961(5)        |
| Ni1P-N3P (Å)       | 1.968(4)        | 1.970(4)        | 1.968(4)        | 1.966(5)        | 1.957(5)        | 1.965(6)        |
| Ni1P-N4P (Å)       | 1.969(3)        | 1.970(4)        | 1.970(4)        | 1.964(4)        | 1.973(5)        | 1.979(5)        |
| <b>Average (Å)</b> | <b>1.967(4)</b> | <b>1.968(4)</b> | <b>1.966(4)</b> | <b>1.964(5)</b> | <b>1.960(6)</b> | <b>1.966(6)</b> |

**Table S4. Metal site occupancy in Ho<sub>2</sub>LuN@C<sub>80</sub> as a function of temperatures**

| Metal sites | 100K       | 130K       | 160K       | 190K       | 250K       | 280K       |
|-------------|------------|------------|------------|------------|------------|------------|
| Lu1         | 0.8370(11) | 0.6459(13) | 0.4505(16) | 0.3510(17) | 0.2625(17) | 0.2289(17) |
| Ho1         | 0.8370(11) | 0.6459(13) | 0.4505(16) | 0.3510(17) | 0.2625(17) | 0.2289(17) |
| Ho2         | 0.8370(11) | 0.6459(13) | 0.4505(16) | 0.3510(17) | 0.2625(17) | 0.2289(17) |
| Lu2         | 0.1630(11) | 0.2592(12) | 0.3346(14) | 0.3120(17) | 0.3171(17) | 0.2775(18) |
| Ho3         | 0.1630(11) | 0.2592(12) | 0.3346(14) | 0.3120(17) | 0.3171(17) | 0.2775(18) |
| Ho4         | 0.1407(15) | 0.2592(12) | 0.3346(14) | 0.3120(17) | 0.3171(17) | 0.2775(18) |
| Lu3         |            | 0.0949(13) | 0.2147(16) | 0.3369(19) | 0.420(2)   | 0.493(2)   |
| Ho5         | 0.0223(13) | 0.0652(14) | 0.1520(18) | 0.205(2)   | 0.210(3)   | 0.225(3)   |
| Ho6         |            | 0.0441(13) | 0.0793(15) | 0.116(2)   | 0.157(3)   | 0.169(3)   |
| Ho7         |            | 0.0298(12) | 0.0629(14) | 0.097(2)   | 0.144(2)   | 0.183(3)   |
| Ho8         |            | 0.0509(16) | 0.0629(18) | 0.092(2)   | 0.114(3)   | 0.132(3)   |
| Ho9         |            |            | 0.0727(19) | 0.075(2)   | 0.086(2)   | 0.095(2)   |
| Ho10        |            |            |            | 0.0352(17) | 0.067(2)   | 0.085(2)   |
| Ho11        |            |            |            | 0.055(2)   | 0.063(3)   | 0.098(3)   |

Table S5. Crystal data\_Lu<sub>3</sub>N@C<sub>80</sub>.

| Crystal                                            | Lu <sub>3</sub> N@C <sub>80</sub> ·NiOEP·2(C <sub>6</sub> H <sub>6</sub> ) | Lu <sub>3</sub> N@C <sub>80</sub> ·NiOEP·2(C <sub>6</sub> H <sub>6</sub> ) | Lu <sub>3</sub> N@C <sub>80</sub> ·NiOEP·2(C <sub>6</sub> H <sub>6</sub> ) |
|----------------------------------------------------|----------------------------------------------------------------------------|----------------------------------------------------------------------------|----------------------------------------------------------------------------|
| Formula                                            | C <sub>128</sub> H <sub>56</sub> Lu <sub>3</sub> N <sub>5</sub> Ni         | C <sub>128</sub> H <sub>56</sub> Lu <sub>3</sub> N <sub>5</sub> Ni         | C <sub>128</sub> H <sub>56</sub> Lu <sub>3</sub> N <sub>5</sub> Ni         |
| Formula weight                                     | 2247.39                                                                    | 2247.39                                                                    | 2247.39                                                                    |
| Color, habit                                       | Black, block                                                               | Black, block                                                               | Black, block                                                               |
| Crystal system                                     | triclinic                                                                  | triclinic                                                                  | triclinic                                                                  |
| Space group                                        | <i>P</i> $\bar{1}$                                                         | <i>P</i> $\bar{1}$                                                         | <i>P</i> $\bar{1}$                                                         |
| <i>a</i> , Å                                       | 14.700(3)                                                                  | 14.750(3)                                                                  | 14.780(3)                                                                  |
| <i>b</i> , Å                                       | 15.380(3)                                                                  | 15.440(3)                                                                  | 15.480(3)                                                                  |
| <i>c</i> , Å                                       | 17.730(4)                                                                  | 17.770(4)                                                                  | 17.860(4)                                                                  |
| $\alpha$ , deg                                     | 81.04(3)                                                                   | 81.20(3)                                                                   | 81.20(3)                                                                   |
| $\beta$ , deg                                      | 74.47(3)                                                                   | 74.32(3)                                                                   | 74.11(3)                                                                   |
| $\gamma$ , deg                                     | 86.42(3)                                                                   | 86.38(3)                                                                   | 86.20(3)                                                                   |
| Volume, Å <sup>3</sup>                             | 3814.1(15)                                                                 | 3849.5(15)                                                                 | 3882.6(15)                                                                 |
| Z                                                  | 2                                                                          | 2                                                                          | 2                                                                          |
| T, K                                               | 100                                                                        | 160                                                                        | 220                                                                        |
| Radiation ( $\lambda$ , Å)                         | Synchrotron Radiation<br>(0.89429)                                         | Synchrotron Radiation<br>(0.89429)                                         | Synchrotron Radiation<br>(0.89429)                                         |
| Unique data ( <i>R</i> <sub>int</sub> )            | 9532 (0.1360)                                                              | 13109 (0.1523)                                                             | 10914 (0.1745)                                                             |
| Parameters                                         | 1263                                                                       | 1327                                                                       | 1320                                                                       |
| Restraints                                         | 1020                                                                       | 897                                                                        | 1165                                                                       |
| Observed data ( <i>I</i> > 2σ( <i>I</i> ))         | 7538                                                                       | 8161                                                                       | 6459                                                                       |
| <i>R</i> <sub>1</sub> <sup>a</sup> (observed data) | 0.0673                                                                     | 0.1212                                                                     | 0.1576                                                                     |
| <i>wR</i> <sub>2</sub> <sup>b</sup> (all data)     | 0.2075                                                                     | 0.4062                                                                     | 0.4704                                                                     |
| CCDC NO.                                           | 1947140                                                                    | 1947141                                                                    | 1947142                                                                    |

$$R_1 = \frac{\sum ||F_o| - |F_c||}{\sum |F_o|} \quad . \quad wR_2 = \sqrt{\frac{\sum [w(F_o^2 - F_c^2)^2]}{\sum [w(F_o^2)^2]}}$$

<sup>a</sup>For data with *I* > 2σ(*I*), <sup>b</sup>For all data,

Table S5. Crystal data\_Lu<sub>3</sub>N@C<sub>80</sub>\_continued.

|                                                                     |                                                                                    |
|---------------------------------------------------------------------|------------------------------------------------------------------------------------|
| <b>Crystal</b>                                                      | <b>Lu<sub>3</sub>N@C<sub>80</sub>NiOEP<sub>2</sub>(C<sub>6</sub>H<sub>6</sub>)</b> |
| <b>Formula</b>                                                      | C <sub>128</sub> H <sub>56</sub> Lu <sub>3</sub> N <sub>5</sub> Ni                 |
| <b>Formula weight</b>                                               | 2247.39                                                                            |
| <b>Color, habit</b>                                                 | Black, block                                                                       |
| <b>Crystal system</b>                                               | triclinic                                                                          |
| <b>Space group</b>                                                  | <i>P</i> $\bar{1}$                                                                 |
| <b><i>a</i>, Å</b>                                                  | 14.820(3)                                                                          |
| <b><i>b</i>, Å</b>                                                  | 15.500(3)                                                                          |
| <b><i>c</i>, Å</b>                                                  | 17.960(4)                                                                          |
| <b><math>\alpha</math>, deg</b>                                     | 81.11(3)                                                                           |
| <b><math>\beta</math>, deg</b>                                      | 73.86(3)                                                                           |
| <b><math>\gamma</math>, deg</b>                                     | 86.07(3)                                                                           |
| <b>Volume, Å<sup>3</sup></b>                                        | 3914.0(15)                                                                         |
| <b>Z</b>                                                            | 2                                                                                  |
| <b>T, K</b>                                                         | 280                                                                                |
| <b>Radiation (<math>\lambda</math>, Å)</b>                          | Synchrotron Radiation (0.89429)                                                    |
| <b>Unique data (<i>R</i><sub>int</sub>)</b>                         | 12095 (0.2152)                                                                     |
| <b>Parameters</b>                                                   | 1320                                                                               |
| <b>Restraints</b>                                                   | 1309                                                                               |
| <b>Observed data (<i>I</i> &gt; 2<math>\sigma</math>(<i>I</i>))</b> | 6204                                                                               |
| <b><i>R</i><sub>1</sub><sup>a</sup> (observed data)</b>             | 0.1605                                                                             |
| <b><i>wR</i><sub>2</sub><sup>b</sup> (all data)</b>                 | 0.4542                                                                             |
| <b>CCDC NO.</b>                                                     | 1947143                                                                            |

$$R_1 = \frac{\sum ||F_o| - |F_c||}{\sum |F_o|} \quad . \quad wR_2 = \sqrt{\frac{\sum [w(F_o^2 - F_c^2)^2]}{\sum [w(F_o^2)^2]}}$$

<sup>a</sup>For data with *I* > 2 $\sigma$ (*I*), <sup>b</sup>For all data,

**Table S6. Nearest cage carbon-Ni contact distances as a function of temperature\_Lu<sub>3</sub>N@C<sub>80</sub>**

| Temperature (K) | 100     | 160     | 220     | 280     |
|-----------------|---------|---------|---------|---------|
| Ni1P-C1A (Å)    | 2.79(2) | 2.83(1) | 2.83(3) | 2.83(2) |

**Table S7. Selected M-N bond lengths as a function of temperature\_Lu<sub>3</sub>N@C<sub>80</sub>**

| Temperature (K)    | 100             | 160             | 220              | 280             |
|--------------------|-----------------|-----------------|------------------|-----------------|
| Lu1A-N1 (Å)        | 2.022(8)        | 2.019(10)       | 2.088(13)        | 2.157(14)       |
| Lu2A-N1 (Å)        | 2.072(8)        | 1.990(9)        | 2.027(10)        | 2.007(10)       |
| Lu3A-N1 (Å)        | 2.048(8)        | 2.101(8)        | 2.019(11)        | 1.976(11)       |
| Lu1B-N1 (Å)        | 1.998(10)       | 2.023(11)       | 2.057(13)        | 2.051(13)       |
| Lu2B-N1 (Å)        | 2.071(10)       | 2.013(9)        | 2.049(11)        | 2.019(9)        |
| Lu3B-N1 (Å)        | 1.996(9)        | 2.053(9)        | 2.028(13)        | 2.010(12)       |
| Lu1C-N1 (Å)        |                 | 1.94(2)         | 1.98(2)          | 1.93(2)         |
| Lu2C-N1 (Å)        |                 | 2.00(2)         | 1.96(2)          | 1.935(14)       |
| Lu3C-N1 (Å)        |                 | 2.06(2)         | 1.91(2)          | 1.90(2)         |
| Lu1D-N1 (Å)        |                 | 1.93(2)         | 1.88(2)          | 1.90(2)         |
| Lu2D-N1 (Å)        |                 | 1.97(2)         | 1.96(2)          | 1.979(12)       |
| Lu3D-N1 (Å)        |                 | 2.028(13)       | 1.95(2)          | 1.91(2)         |
| Lu2F-N1 (Å)        |                 | 2.02(2)         | 1.95(3)          | 1.92(2)         |
| Lu3E-N1 (Å)        |                 | 2.04(3)         | 1.97(3)          | 1.96(2)         |
| Lu3F-N1(Å)         |                 |                 | 2.00(3)          | 1.96(2)         |
| <b>Average (Å)</b> | <b>2.044(9)</b> | <b>2.02(2)</b>  | <b>2.00(2)</b>   | <b>1.98(2)</b>  |
| Ni1P-N1P (Å)       | 1.974(7)        | 1.969(8)        | 1.949(9)         | 1.965(8)        |
| Ni1P-N2P (Å)       | 1.973(9)        | 1.961(10)       | 1.938(10)        | 1.961(9)        |
| Ni1P-N3P (Å)       | 1.972(7)        | 1.968(8)        | 1.946(9)         | 1.967(8)        |
| Ni1P-N4P (Å)       | 1.950(9)        | 1.941(10)       | 1.982(10)        | 1.944(9)        |
| <b>Average (Å)</b> | <b>1.967(8)</b> | <b>1.960(9)</b> | <b>1.954(10)</b> | <b>1.959(9)</b> |

**Table S8. Metal site occupancy in Lu<sub>3</sub>N@C<sub>80</sub> as a function of temperatures**

| Metal sites | 100K     | 160K       | 220K       | 280K       |
|-------------|----------|------------|------------|------------|
| Lu1A        | 0.853(2) | 0.5127(18) | 0.3104(19) | 0.2407(18) |
| Lu2A        | 0.853(2) | 0.5127(18) | 0.3104(19) | 0.2407(18) |
| Lu3A        | 0.853(2) | 0.5127(18) | 0.3104(19) | 0.2407(18) |
| Lu1B        | 0.147(2) | 0.2610(17) | 0.2812(19) | 0.2819(18) |
| Lu2B        | 0.147(2) | 0.2610(17) | 0.2812(19) | 0.2819(18) |
| Lu3B        | 0.147(2) | 0.2610(17) | 0.2812(19) | 0.2819(18) |
| Lu1C        |          | 0.075(2)   | 0.141(3)   | 0.153(3)   |
| Lu2C        |          | 0.117(3)   | 0.210(3)   | 0.202(3)   |
| Lu3C        |          | 0.078(2)   | 0.111(3)   | 0.130(3)   |
| Lu1D        |          | 0.151(2)   | 0.267(3)   | 0.324(3)   |
| Lu2D        |          | 0.075(2)   | 0.127(3)   | 0.194(3)   |
| Lu3D        |          | 0.085(2)   | 0.104(3)   | 0.125(3)   |
| Lu2F        |          | 0.034(2)   | 0.071(3)   | 0.081(3)   |
| Lu3E        |          | 0.063(2)   | 0.093(3)   | 0.104(3)   |
| Lu3F        |          |            | 0.100(3)   | 0.118(3)   |

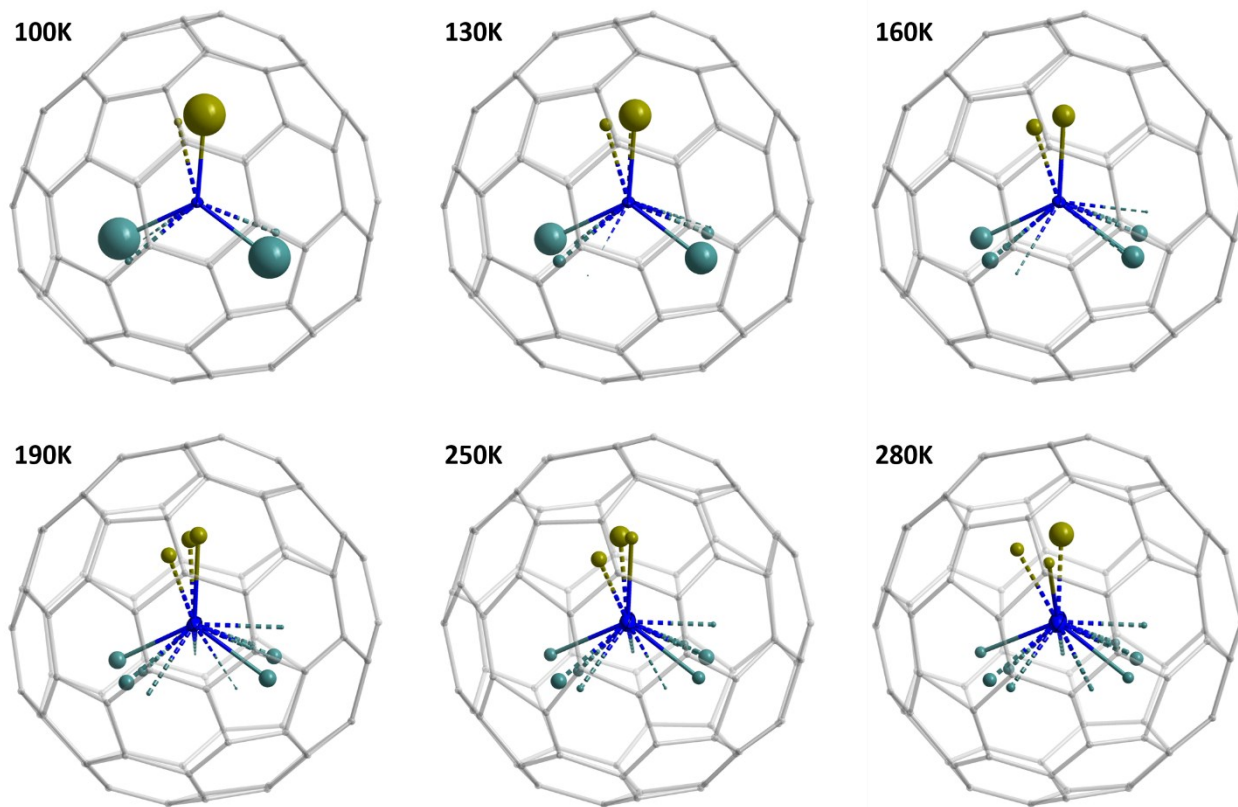

**Fig. S1.** Molecular structure of  $\text{Ho}_2\text{LuN}@C_{80}\cdot\text{NiOEP}\cdot 2(\text{C}_6\text{H}_6)$  measured with single-crystal X-ray diffraction at variable temperatures from 100K to 280K. The metal sites are shown as spheres whose radii are scaling proportional to the site occupancy (the bigger the sphere, the higher the occupancy). Color code: grey for carbon, brown for Lu, cyan for Ho, and blue for N.



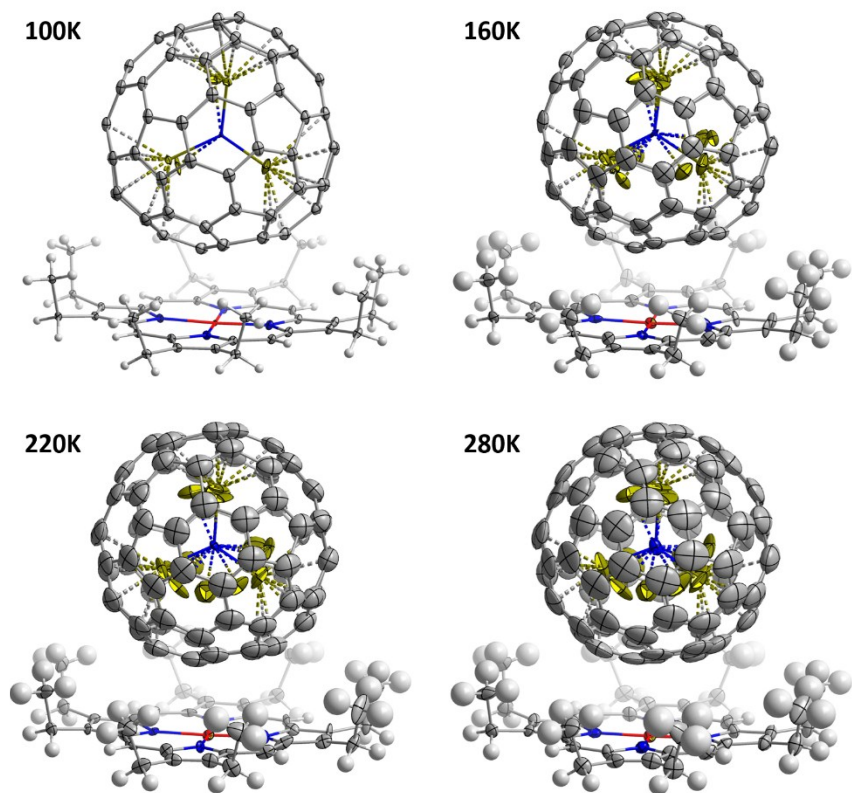

**Fig. S2.** Single-crystal X-ray structures of  $\text{Lu}_3\text{N}@C_{80}\text{-NiOEP}\cdot 2(\text{C}_6\text{H}_6)$  measured at variable temperatures from 100K to 280K. Solvent molecules are omitted for clarity. The displacement parameters are shown at the 30% probability level. The structures are drawn from a specific direction of the crystal to easily compare the dynamics of the  $\text{Lu}_3\text{N}@C_{80}$ . Color code: grey for carbon, brown for Lu, blue for N, white for H, and red for Ni.

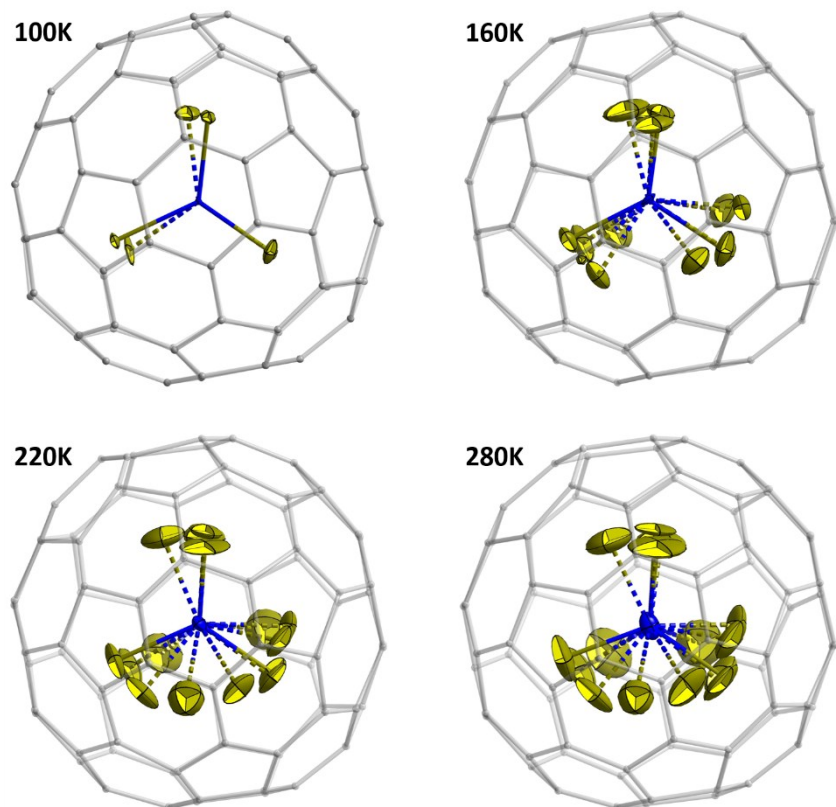

**Fig. S3.** Molecular structures of  $\text{Lu}_3\text{N}@C_{80}\cdot\text{NiOEP}\cdot 2(\text{C}_6\text{H}_6)$  measured with single crystal X-ray diffraction at variable temperatures from 100K to 280K. NiOEP and solvent molecules are omitted for clarity. The displacement parameters are shown at the 30% probability level for the encapsulated  $\text{Lu}_3\text{N}$  cluster. The structures are drawn from the chosen specific direction of the crystal to compare the dynamics of the  $\text{Lu}_3\text{N}@C_{80}$ . Color code: grey for carbon, brown for Lu, and blue for N.

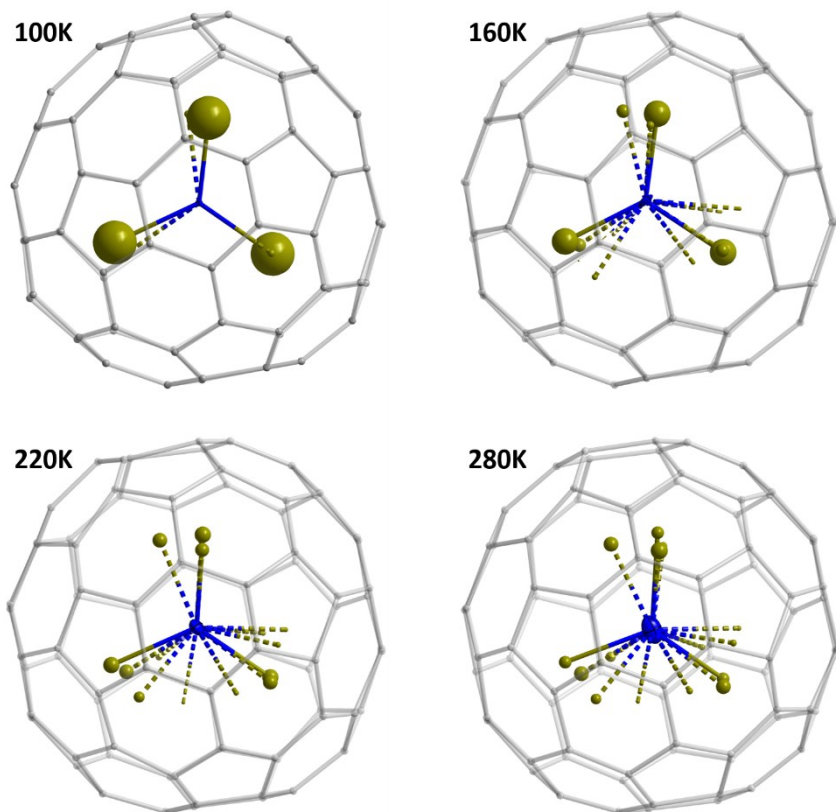

**Fig. S4.** Molecular structure of  $\text{Lu}_3\text{N}@C_{80}\cdot\text{NiOEP}\cdot 2(\text{C}_6\text{H}_6)$  measured with single-crystal X-ray diffraction at variable temperatures from 100K to 280K. The metal sites are shown as spheres whose radii are scaling proportional to the site occupancy (the bigger the sphere, the higher the occupancy). Color code: grey for carbon, brown for Lu, and blue for N.

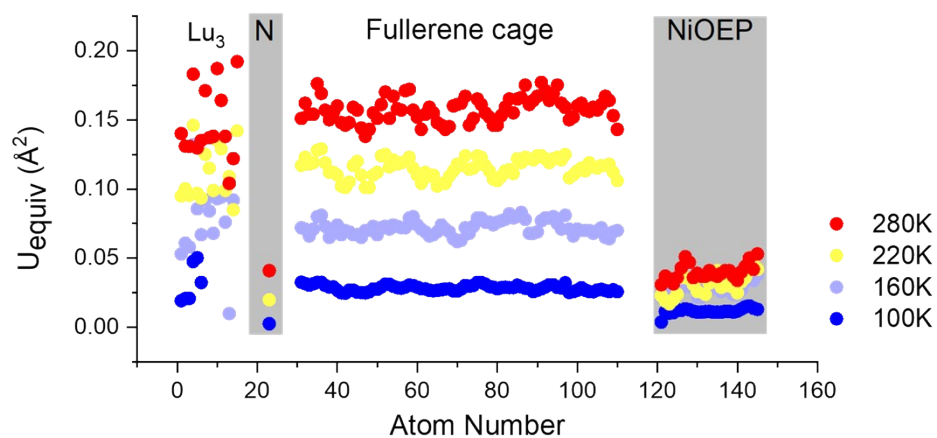

**Fig. S5.** Equivalent atomic displacement parameters of  $\text{Lu}_3\text{N}@C_{80}\cdot\text{NiOEP}\cdot 2(\text{C}_6\text{H}_6)$  as a function of temperature between 100 and 280K. The encapsulated N and co-crystallized NiOEP were highlighted with grey rectangles.

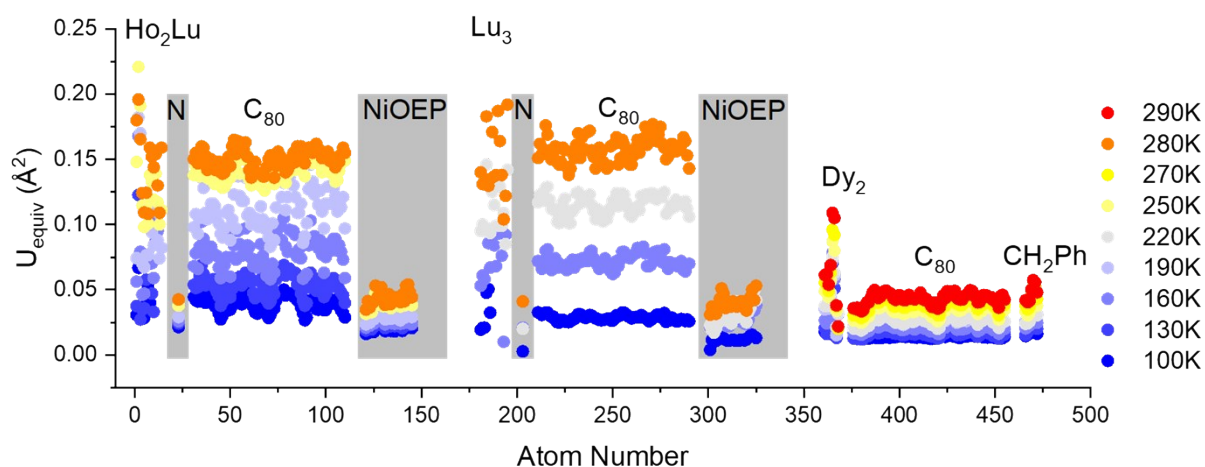

**Fig. S6.** Comparison of equivalent atomic displacement parameters of  $\text{Ho}_2\text{LuN}@C_{80}\text{-NiOEP}\cdot 2(\text{C}_6\text{H}_6)$ ,  $\text{Lu}_3\text{N}@C_{80}\text{-NiOEP}\cdot 2(\text{C}_6\text{H}_6)$ , and  $\text{Dy}_2@C_{80}\text{-CH}_2\text{Ph}\cdot 0.67(\text{C}_7\text{H}_8)^4$  as a function of temperature between 100 and 290K. The encapsulated N and co-crystallized NiOEP were highlighted with grey rectangles.

#### Reference:

1. U. Mueller, R. Förster, M. Hellmig, F. U. Huschmann, A. Kastner, P. Malecki, S. Pühringer, M. Röwer, K. Sparta, M. Steffien, M. Ühlein, P. Wilk and M. S. Weiss, *Eur. Phys. J. Plus*, 2015, **130**, 141.
2. K. M. Sparta, M. Krug, U. Heinemann, U. Mueller and M. S. Weiss, *J. Appl. Cryst.*, 2016, **49**, 1085-1092.
3. G. Sheldrick, *Acta Cryst. C*, 2015, **71**, 3-8.
4. (a) F. Liu, G. Velkos, D. S. Krylov, L. Spree, M. Zalibera, R. Ray, N. A. Samoylova, C.-H. Chen, M. Rosenkranz, S. Schiemenz, F. Ziegs, K. Nenkov, A. Kostanyan, T. Greber, A. U. B. Wolter, M. Richter, B. Büchner, S. M. Avdoshenko and A. A. Popov, *Nat. Commun.*, 2019, **10**, 571; (b) F. Liu, D. S. Krylov, L. Spree, S. M. Avdoshenko, N. A. Samoylova, M. Rosenkranz, A. Kostanyan, T. Greber, A. U. B. Wolter, B. Büchner and A. A. Popov, *Nat. Commun.*, 2017, **8**, 16098.
